# Supplementary material for: 2-aminoimidazoles potentiate ß-lactam antimicrobial activity against Mycobacterium tuberculosis by reducing ß-lactamase secretion and increasing cell envelope permeability
Source: PLoS One. 2017 Jul 27;12(7):e0180925. doi: 10.1371/journal.pone.0180925 (PMC5547695; doi:10.1371/journal.pone.0180925)
Supplement: S5 Table — (XLSX) [file pone.0180925.s011.xlsx]

## Sheet: S3A, up>1.5x, p<0.05, 2 & 24hr 
Table S3A: Gene expression induced (>1.5x, p<0.05) at both 2 hr and 24 hr, data shown for 2 hours
Gene	Counts per million (CPM)				2-AI/control
Rv Number	Control Rep 1	Control Rep 2	2-AI Rep 1	2-AI Rep 2	Fold-change	Log2 Fold-change	Log2 CPM	p-value	Adjusted p-value	Gene name	Proposed gene function
Rv0008c	69.7968	62.9081	105.675	105.161	1.58763	0.666878	6.44013	2.55e-07	1.59e-06	Rv0008c	hypothetical protein
Rv0208c	149.591	162.531	278.578	280.222	1.79093	0.840711	7.77423	5.57e-16	1.03e-14
Rv0251c	279.557	308.422	1114.27	1179.08	3.90128	1.96395	9.49739	3.2e-85	4.12e-83	hsp	possible heat shock protein
Rv0262c	62.021	51.2068	125.347	135.751	2.30254	1.20322	6.57169	9.12e-19	2.12e-17	Rv0262c	aminoglycoside 2'-N-acetyltransferase
Rv0288	114.693	114.866	204.251	190.476	1.71962	0.782089	7.29636	4.72e-13	6.29e-12	Rv0288	conserved hypothetical protein
Rv0292	260.951	268.809	428.473	453.981	1.66582	0.736234	8.46815	9.48e-14	1.37e-12	Rv0292	unknown possible membrane protein
Rv0307c	25.9192	20.5042	39.8579	38.9719	1.69379	0.760253	5.01006	6.09e-06	2.98e-05	Rv0307c	hypothetical protein
Rv0347	46.7472	44.873	72.4029	73.849	1.59558	0.674077	5.91567	8.83e-07	5.03e-06	Rv0347	conserved hypothetical protein
Rv0406c	39.4342	37.3584	68.4684	67.4902	1.7695	0.823344	5.76112	6.74e-09	5.41e-08
Rv0445c	244.011	254.316	404.524	405.086	1.62484	0.700296	8.35765	1.86e-12	2.33e-11	sigK	ECF-type sigma factor
Rv0446c	63.5021	67.4169	209.04	206.565	3.1759	1.66716	7.11541	7.78e-49	5.54e-47	Rv0446c	conserved hypothetical protein
Rv0447c	50.4499	50.7774	355.813	357.78	7.04897	2.81741	7.69106	3.46e-147	8.27e-145	ufaA1	unknown fatty acid methyltransferase
Rv0449c	72.111	81.6947	510.541	510.632	6.64515	2.7323	8.21281	3.54e-131	6.98e-129	Rv0449c	putative dehydrogenase
Rv0450c	466.824	491.242	810.972	793.07	1.67441	0.743651	9.32561	3.98e-15	6.56e-14	mmpL4	conserved large membrane protein
Rv0451c	106.547	98.7636	193.089	185.514	1.84328	0.882278	7.20183	2.43e-15	4.12e-14
Rv0452	38.6937	30.9173	129.111	118.024	3.54286	1.82491	6.34479	7.87e-35	3.93e-33	Rv0452	putative transcriptional regulator
Rv0467	207.076	207.082	698.327	683.38	3.33613	1.73818	8.8176	4.56e-69	4.92e-67	aceA	isocitrate lyase
Rv0468	99.2336	86.9549	217.807	233.542	2.422	1.2762	7.3315	2.79e-28	1.15e-26
Rv0516c	185.6	210.839	1373.09	1321.04	6.79884	2.76529	9.59935	7.84e-151	2.02e-148	Rv0516c	conserved hypothetical protein
Rv0676c	1312.16	1409.96	3039.47	2982	2.21215	1.14545	11.0951	1.17e-34	5.67e-33	mmpL5	conserved large membrane protein
Rv0677c	325.842	433.057	1090.32	1074.26	2.85329	1.51263	9.51738	2.28e-33	1.08e-31	mmpS5	conserved small membrane protein
Rv0678	111.823	102.414	256.938	220.776	2.2291	1.15646	7.44767	1.4e-22	4.03e-21	Rv0678	hypothetical protein
Rv0802c	58.8737	61.2979	111.192	109.979	1.84092	0.88043	6.43456	5.3e-12	6.24e-11	Rv0802c	acetyltransferase
Rv0827c	65.0758	61.942	130.223	124.479	2.00453	1.00326	6.5963	3.37e-16	6.44e-15	Rv0827c	transcriptional regulator (ArsR family)
Rv0830	32.0288	34.0305	60.2573	57.2294	1.77961	0.83156	5.55159	1.38e-08	1.07e-07	Rv0830	conserved hypothetical protein
Rv0884c	176.251	179.922	303.81	286.484	1.65754	0.729043	7.89293	2.85e-13	3.93e-12	serC	phosphoserine aminotransferase
Rv0888	126.912	131.613	367.189	364.235	2.82969	1.50064	7.96249	1.52e-48	1.06e-46	Rv0888	possible membrane protein
Rv0981	211.334	180.351	289.569	303.634	1.51365	0.598031	7.94928	5.14e-08	3.57e-07	Rv0981	two-component response regulator
Rv1057	42.9519	48.7377	245.605	248.717	5.39758	2.43231	7.22052	3.29e-92	4.78e-90	Rv1057	conserved hypothetical protein
Rv1058	45.0809	46.0539	113.031	115.037	2.50267	1.32347	6.34712	6.72e-24	2.04e-22
Rv1072	2057.62	2099.16	3324.12	3137.79	1.55457	0.636517	11.3749	1.45e-12	1.85e-11	Rv1072	probable transmembrane protein
Rv1073	390.825	445.939	778.385	764.696	1.84454	0.88326	9.21973	2e-18	4.56e-17	Rv1073	conserved hypothetical protein
Rv1128c	44.9884	44.0142	106.359	116.819	2.50646	1.32565	6.31555	2.32e-22	6.57e-21	Rv1128c	REP-family protein
Rv1129c	30.9179	31.5614	322.926	309.27	10.1196	3.33909	7.46634	7.61e-180	2.55e-177	Rv1129c	transcriptional regulator (PbsX/Xre family)
Rv1130	144.87	139.343	2408.67	2537.94	17.4	4.12101	10.3568	0	0	Rv1130	conserved hypothetical protein
Rv1131	67.1123	69.5639	2138.22	2172.74	31.5489	4.97952	10.1238	0	0	gltA1	citrate synthase 3
Rv1132	88.5882	101.555	648.376	632.028	6.73944	2.75263	8.53381	1.27e-134	2.65e-132	Rv1132	possible transporter
Rv1216c	78.0354	93.5034	513.15	507.694	5.95757	2.57472	8.23333	8.42e-107	1.48e-104	Rv1216c	conserved hypothetical protein
Rv1217c	125.986	112.397	1079.24	1169.16	9.42514	3.23651	9.28767	1.64e-190	7.82e-188	Rv1217c	probable integral membrane protein
Rv1218c	45.5438	47.3421	465.594	480.476	10.1882	3.34883	8.03881	6.76e-198	3.77e-195	Rv1218c	probable ABC transmembrane transport proteinportein
Rv1219c	30.8254	37.7878	390.839	370.883	11.1281	3.47614	7.72004	4.61e-170	1.29e-167	Rv1219c	putative transcriptional regulator
Rv1221	827.841	780.125	1300.56	1242.81	1.58164	0.661423	10.0208	2.38e-12	2.94e-11	sigE	ECF subfamily sigma subunit
Rv1239c	65.6312	72.8918	121.712	118.842	1.73776	0.797228	6.58254	2.12e-10	2.04e-09
Rv1316c	43.6924	48.845	73.3438	68.7427	1.5369	0.62002	5.89426	1.19e-05	5.48e-05	ogt	methylated-DNA-protein-cysteine methyltransferase
Rv1342c	26.0118	26.8379	55.0399	50.437	1.99662	0.997561	5.34826	1.1e-10	1.09e-09	pks14	polyketide synthase (chalcone synthase-like)
Rv1343c	42.3964	45.9465	76.594	72.452	1.68832	0.755587	5.91461	6.81e-08	4.65e-07	Rv1343c	conserved hypothetical protein
Rv1344	25.0861	27.16	86.3874	81.4122	3.21439	1.68455	5.82907	8.76e-30	3.71e-28
Rv1346	201.059	221.681	351.237	342.124	1.64069	0.714303	8.12963	7.63e-12	8.86e-11	fadE14	acyl-CoA dehydrogenase
Rv1348	394.805	402.891	652.139	635.737	1.61457	0.69115	9.02912	6.77e-13	8.92e-12	Rv1348	heavy metal tolerance protein
Rv1349	174.307	161.672	277.894	311.678	1.75406	0.810697	7.86144	2.24e-14	3.4e-13	Rv1349	probable membrane protein
Rv1461	495.613	490.168	854.85	841.146	1.72043	0.782766	9.39149	4.29e-17	8.86e-16	Rv1461	conserved hypothetical protein
Rv1462	258.174	224.043	353.547	392.994	1.54747	0.629915	8.26754	1.67e-08	1.26e-07
Rv1463	227.256	255.927	492.793	474.599	2.00281	1.00203	8.50798	1.27e-21	3.49e-20	Rv1463	ABC-type transporter
Rv1464	267.986	204.29	366.206	395.162	1.6112	0.688138	8.27372	9.15e-08	6.09e-07	Rv1464	NifS-like protein
Rv1465	67.0197	71.9257	122.525	117.156	1.72587	0.787324	6.58079	2.27e-10	2.17e-09	Rv1465	conserved hypothetical protein
Rv1466	69.5191	73.4286	147.928	137.823	1.99984	0.999886	6.76155	1.13e-16	2.24e-15	Rv1466	conserved hypothetical protein
Rv1471	93.4018	114.866	212.718	194.811	1.95869	0.969889	7.27849	7.98e-15	1.28e-13	trxB	thioredoxin reductase
Rv1535	399.063	431.232	1514.13	1596.3	3.74666	1.9056	9.94775	2.64e-82	3.28e-80	Rv1535	hypothetical protein
Rv1536	501.259	428.656	1143.69	1197.63	2.51713	1.33178	9.67887	5.21e-37	2.81e-35	ileS	isoleucyl-tRNA synthase
Rv1690	55.4486	44.7657	131.377	129.97	2.60345	1.38042	6.52532	3.97e-24	1.23e-22	lprJ	lipoprotein
Rv1772	215.592	258.718	479.792	464.531	1.99188	0.994132	8.4759	3.61e-19	8.51e-18
Rv1808	101.27	96.4019	307.274	317.507	3.1594	1.65965	7.69835	4.23e-56	3.45e-54	PPE	PPE-family protein
Rv1809	62.9467	64.5184	295.385	282.004	4.53059	2.1797	7.48159	2.62e-89	3.66e-87	PPE	PPE-family protein
Rv1810	151.627	185.504	337.339	311.582	1.92613	0.945702	7.95316	1.31e-15	2.3e-14
Rv1909c	75.0732	81.5873	144.25	145.675	1.85156	0.888744	6.81809	4.85e-14	7.09e-13
Rv1988	104.695	77.0786	131.506	144.759	1.51789	0.602065	6.85087	4e-05	0.000163769	Rv1988	possible rRNAmethyltransferase
Rv1991A	31.3808	34.4599	62.8661	57.7593	1.83389	0.874904	5.57525	4.22e-09	3.49e-08
Rv1994c	29.0666	32.8496	118.719	107.907	3.66475	1.87371	6.21346	1.08e-38	6.36e-37	Rv1994c	transcriptional regulator (MerR family)
Rv1995	24.7158	28.5556	42.5094	42.4403	1.59686	0.675238	5.14361	2.47e-05	0.000104917
Rv2006	333.803	346.209	570.67	559.094	1.66154	0.732518	8.82507	4.26e-14	6.28e-13	otsB	trehalose-6-phosphate phosphatase
Rv2007c	644.463	699.719	1320.49	1211.26	1.88369	0.913564	9.92231	3.33e-20	8.57e-19	fdxA	ferredoxin
Rv2025c	49.8945	50.7774	202.754	213.213	4.13191	2.04681	7.03888	2.92e-69	3.25e-67	Rv2025c	possible membrane protein
Rv2050	26.2895	25.4424	46.4439	39.02	1.65211	0.724307	5.13678	1.09e-05	5.09e-05
Rv2052c	379.069	284.16	502.116	587.035	1.64152	0.715033	8.77875	1.5e-07	9.64e-07	Rv2052c	hypothetical protein
Rv2053c	195.69	156.197	300.987	332.634	1.79934	0.847464	7.952	4.21e-12	5.03e-11
Rv2115c	616.877	707.77	1054.91	1009.7	1.55887	0.640496	9.7284	2.82e-10	2.64e-09	Rv2115c	ATPase of AAA-family
Rv2123	28.1409	25.2277	91.1344	91.1912	3.41123	1.77029	5.92747	5.89e-34	2.81e-32
Rv2180c	27.4003	22.0071	38.7888	39.5499	1.58177	0.661537	5.03356	6.45e-05	0.000251006	Rv2180c	probable integral membrane protein
Rv2378c	101.826	100.159	202.326	207.047	2.02641	1.01892	7.26888	2.03e-21	5.44e-20	mbtG	mycobactin/exochelin synthesis (lysine hydroxylase)
Rv2379c	462.658	401.173	805.969	881.274	1.9527	0.965467	9.32007	6.88e-20	1.73e-18	mbtF	mycobactin/exochelin synthesis (lysine ligation)
Rv2380c	498.852	494.355	1347.73	1342.43	2.70849	1.43749	9.84986	3.29e-53	2.56e-51	mbtE	mycobactin/exochelin synthesis (lysine ligation)
Rv2381c	317.14	313.789	747.593	777.944	2.41778	1.27368	9.07912	3.57e-40	2.13e-38	mbtD	mycobactin/exochelin synthesis (polyketide
Rv2382c	90.995	76.4344	174.485	180.985	2.12079	1.0846	7.04646	1.06e-18	2.45e-17	mbtC	mycobactin/exochelin synthesis
Rv2383c	559.022	501.333	1066.46	1151.19	2.09103	1.06422	9.68129	3.71e-26	1.33e-24	mbtB	mycobactin/exochelin synthesis (serine/threonine
Rv2384	67.2974	61.2979	102.638	109.545	1.64875	0.721372	6.42947	3.69e-08	2.6e-07	mbtA	mycobactin/exochelin synthesis (salicylate-AMP
Rv2405	164.587	164.248	291.878	274.682	1.72299	0.784914	7.81373	3.92e-15	6.49e-14
Rv2460c	398.786	421.57	876.404	879.348	2.14045	1.09792	9.33443	1.01e-30	4.49e-29	clpP2	ATP-dependent Clp protease proteolytic subunit
Rv2461c	391.658	464.404	931.915	930.844	2.17656	1.12205	9.41206	5.2e-27	1.98e-25	clpP	ATP-dependent Clp protease proteolytic subunit
Rv2577	27.03	31.3467	52.089	48.7509	1.72998	0.790759	5.34847	4.88e-07	2.91e-06	Rv2577	hypothetical protein
Rv2640c	36.9349	24.6909	58.3329	67.7792	2.04029	1.02878	5.59055	3.25e-08	2.33e-07
Rv2641	104.603	128.715	398.922	375.941	3.32412	1.73297	7.98984	2.75e-47	1.88e-45	Rv2641	conserved hypothetical protein
Rv2642	38.8788	39.9349	84.1636	87.2892	2.17557	1.12139	5.99833	4.7e-16	8.89e-15
Rv2643	98.7707	97.9048	150.622	157.766	1.56777	0.648711	6.99093	7.99e-09	6.36e-08	arsC	probable arsenical pump
Rv2699c	53.875	58.3994	161.228	158.874	2.85284	1.5124	6.78053	6.65e-36	3.48e-34	Rv2699c	conserved hypothetical protein
Rv2710	1460.73	1606.95	2826.32	2589.58	1.76557	0.820136	11.0513	5.5e-17	1.12e-15	sigB	RNA polymerase sigma factor (aka MysB)
Rv2744c	506.906	568.428	887.524	871.399	1.63598	0.710156	9.4709	3.13e-13	4.26e-12	35kd_ag	35-kd antigen
Rv2745c	81.4604	79.4403	148.612	161.138	1.92448	0.944469	6.89399	1.2e-15	2.12e-14	Rv2745c	putative transcriptional regulator
Rv2818c	22.309	24.0468	35.8807	34.2991	1.51536	0.599658	4.89924	0.000154812	0.000558603
Rv2843	110.805	127.427	182.953	176.891	1.5115	0.595978	7.23244	2.38e-07	1.49e-06	Rv2843	hypothetical protein
Rv2873	43.8775	60.8684	968.565	936.24	18.2272	4.18802	8.983	3.16e-185	1.32e-182	mpt83	surface lipoprotein Mpt83
Rv2874	58.0405	65.8066	583.885	587.275	9.46633	3.2428	8.35305	1.13e-179	3.44e-177	DipZ
Rv2875	22.2165	26.9453	1281.91	1383.57	54.3792	5.76498	9.4148	0	0	mpt70	major secreted immunogenic protein Mpt70 precursor
Rv2876	67.2974	58.0773	488.003	465.687	7.59646	2.92533	8.09189	4.58e-140	1.02e-137
Rv3082c	31.1031	28.6629	57.5203	60.457	1.97184	0.979541	5.51094	5.06e-11	5.29e-10	virS	putative virulence regulating protein (AraC/XylS
Rv3159c	35.9166	33.0643	662.617	627.644	18.6793	4.22337	8.42377	2.7e-285	1.8e-282	PPE	PPE-family protein
Rv3160c	66.3717	80.1918	2250.73	2433.4	32.0019	5.00009	10.2426	0	0	Rv3160c	putative transcriptional regulator
Rv3161c	104.603	165.107	6281.3	5859.17	45.0553	5.49363	11.6011	1.01e-184	3.75e-182	Rv3161c	putative dioxygenasesdiooxygenases
Rv3179	30.9179	31.3467	53.8852	52.8938	1.71507	0.778265	5.43336	1.59e-07	1.01e-06	Rv3179	conserved hypothetical protein
Rv3269	91.5504	92.4299	282.769	284.943	3.08573	1.62561	7.56956	1.27e-53	1.01e-51	Rv3269	probable heat shock protein
Rv3270	2114.18	1773.56	5239.61	5686.52	2.81022	1.49068	11.8555	3.64e-44	2.39e-42	ctpC	cation transport ATPase
Rv3337	29.1591	29.5217	44.5194	45.4752	1.53358	0.616905	5.2454	5.71e-05	0.000224843
Rv3354	44.0627	40.0422	119.274	122.985	2.87745	1.52479	6.38207	4.6e-30	2e-28	Rv3354	conserved hypothetical protein
Rv3397c	28.974	29.6291	48.1546	43.3556	1.56218	0.643563	5.26051	3.69e-05	0.000152139	phyA	phytoene synthase
Rv3398c	28.4186	33.7085	69.9225	72.5483	2.29654	1.19946	5.71483	2.06e-15	3.53e-14	idsA	geranylgeranyl pyrophosphate synthase
Rv3402c	168.197	184.43	273.061	258.158	1.50706	0.591732	7.7934	1.76e-08	1.32e-07	Rv3402c	possible involved in LPS synthesis
Rv3675	158.755	186.899	367.36	344.484	2.0606	1.04307	8.05424	1.94e-20	5.04e-19	Rv3675	hypothetical protein
Rv3742c	36.2869	33.279	54.5267	52.5084	1.53743	0.620522	5.49074	2.97e-05	0.000124705	Rv3742c	possible monooxygenase-b
Rv3765c	86.1814	96.4019	173.031	168.027	1.86919	0.902413	7.04583	9.48e-15	1.48e-13	Rv3765c	two-component response regulator
Rv3823c	417.299	455.923	743.787	697.688	1.65105	0.723384	9.1793	1.67e-13	2.35e-12	mmpL8	conserved large membrane protein
Rv3824c	321.491	360.058	593.293	579.231	1.7208	0.783081	8.86003	1.68e-14	2.57e-13	papA1	PKS-associated protein, unknown function
Rv3837c	127.004	112.719	185.091	186.525	1.54923	0.631547	7.26477	1.42e-08	1.09e-07	Rv3837c	putative phosphoglycerate mutase
Rv3839	37.3977	42.9407	94.5557	91.0467	2.31298	1.20975	6.08614	6.74e-18	1.48e-16	Rv3839	hypothetical protein
Rv3840	25.2712	25.335	47.5131	47.6911	1.88104	0.911527	5.2289	4.74e-09	3.89e-08
Rv3913	172.733	164.033	268.87	272.369	1.60676	0.684156	7.78477	1.75e-11	1.92e-10	trxB2	thioredoxin reductase

## Sheet: S3B, down >1.5x, p<0.05, 2&24hr
S5 Table: Gene expression repressed (>1.5x, p<0.05) at both 2 hr and 24 hr, data shown for 2 hours
Gene	Counts per million (CPM)				2-AI/control
Rv Number	Control Rep 1	Control Rep 2	2-AI Rep 1	2-AI Rep 2	Fold-change	Log2 Fold-change	Log2 CPM	p-value	Adjusted p-value	Gene name	Proposed gene function
Rv0015c	318.251	286.2	200.573	193.559	0.651928	-0.617215	7.95996	3.72e-09	3.09e-08	pknA	serine-threonine protein kinase
Rv0069c	333.895	349.752	170.465	168.22	0.495483	-1.01309	7.99089	1.33e-23	3.98e-22
Rv0070c	291.128	292.211	180.002	180.359	0.61777	-0.694858	7.87737	1.14e-12	1.48e-11	glyA2	serine hydroxymethyltransferase
Rv0082	94.7903	66.8801	52.9444	54.0018	0.660751	-0.597822	6.05869	0.000380589	0.00123277	Rv0082	probable oxidoreductase subunit
Rv0085	54.4304	37.8952	22.3666	24.52	0.506896	-0.980237	5.08698	1.96e-07	1.24e-06	hycP	putative formate hydrogen lyase hycP
Rv0236c	533.473	369.183	273.788	297.66	0.632876	-0.660006	8.5231	7.99e-06	3.83e-05	Rv0236c	possible membrane protein
Rv0280	203.373	131.184	34.2556	38.5865	0.217565	-2.20048	6.64042	1.84e-32	8.53e-31	PPE	PPE-family protein
Rv0339c	374.81	313.36	162.939	180.359	0.498658	-1.00388	8.00424	9.22e-18	1.98e-16	Rv0339c	conserved hypothetical protein
Rv0410c	1346.04	1381.08	466.064	439.77	0.332181	-1.58996	9.82395	3.84e-62	3.57e-60	pknG	serine-threonine protein kinase
Rv0411c	931.241	942.548	300.945	294.481	0.317782	-1.65389	9.26533	4.8e-68	5.02e-66	glnH	putative glutamine binding protein
Rv0430	123.116	102.628	76.594	71.9221	0.657548	-0.604833	6.53913	4.66e-06	2.36e-05	Rv0430	hypothetical protein
Rv0513	172.826	152.117	78.9889	80.6414	0.491047	-1.02607	6.90737	1.26e-17	2.66e-16	Rv0513	probable membrane protein
Rv0514	153.757	95.6504	49.4375	61.9503	0.44618	-1.1643	6.47687	4.45e-09	3.65e-08	Rv0514	possible membrane protein
Rv0706	523.291	379.703	273.831	299.587	0.634815	-0.655593	8.52532	2.15e-06	1.14e-05
Rv0707	627.708	663.649	425.693	403.255	0.641994	-0.639369	9.04802	7.61e-11	7.76e-10	rpsC	30S ribosomal protein S3
Rv0950c	433.684	382.494	224.992	236.095	0.564794	-0.824203	8.31468	9.26e-15	1.46e-13	Rv0950c	conserved hypothetical protein
Rv0972c	90.347	97.4754	63.8069	56.7476	0.642289	-0.638705	6.25614	2.84e-06	1.49e-05	fadE12	acyl-CoA dehydrogenase
Rv0973c	184.119	143.315	83.6931	86.952	0.520806	-0.941182	6.94894	2.82e-12	3.44e-11
Rv0974c	102.473	107.996	48.3684	47.4985	0.455661	-1.13397	6.23573	7.98e-18	1.74e-16	accD2	acetyl/propionyl-CoA carboxylase, [beta] subunit
Rv0975c	89.1436	78.0447	44.5194	50.9187	0.570331	-0.81013	6.01919	2.28e-08	1.67e-07	fadE13	acyl-CoA dehydrogenase
Rv1013	1761.58	1679.52	416.541	437.024	0.248039	-2.01136	10.0653	6.19e-96	9.87e-94	pks16	polyketide synthase
Rv1163	324.638	236.496	130.223	138.738	0.47908	-1.06166	7.68931	2.58e-14	3.88e-13	narJ	nitrate reductase [delta] chain			whole regulon down at 2 h
Rv1297	5149.59	5921.84	3594.31	3469.65	0.638051	-0.648257	12.1463	1.87e-11	2.04e-10	rho	transcription termination factor rho
Rv1305	244.381	225.868	138.861	127.417	0.566229	-0.820543	7.51754	4.39e-14	6.45e-13	atpE	ATP synthase c chain
Rv1306	766.839	871.482	490.569	493.194	0.600545	-0.735655	9.35451	1.85e-13	2.6e-12	atpF	ATP synthase b chain
Rv1308	1685.86	1890.03	1203.74	1149.79	0.658207	-0.603387	10.533	7.24e-10	6.47e-09	atpA	ATP synthase [alpha] chain
Rv1310	808.032	845.395	482.059	464.916	0.57278	-0.803947	9.34238	1.81e-17	3.81e-16	atpD	ATP synthase [beta] chain
Rv1386	142.278	97.6901	44.0063	47.1612	0.379584	-1.39751	6.34709	4.92e-16	9.14e-15	PE	PE-family protein
Rv1387	1495.82	1403.09	651.968	637.761	0.444893	-1.16847	10.0304	5.13e-35	2.6e-33	PPE	PPE-family protein
Rv1592c	545.97	609.758	176.667	167.545	0.297906	-1.74707	8.54283	3.72e-61	3.37e-59	Rv1592c	conserved hypothetical protein
Rv1642	373.607	340.412	176.838	180.793	0.500769	-0.997782	8.0595	7.25e-22	2e-20
Rv1653	281.224	175.413	116.409	131.078	0.541673	-0.884505	7.45259	5.67e-07	3.36e-06
Rv1654	196.338	162.745	83.0089	92.4437	0.488289	-1.03419	7.05014	7.66e-16	1.4e-14	argB	acetylglutamate kinase
Rv1655	156.071	104.453	59.7869	69.1762	0.494554	-1.0158	6.59063	6.04e-09	4.9e-08	argD	acetylornithine aminotransferase
Rv1661	129.041	111.968	70.735	73.3191	0.59736	-0.743328	6.57764	6.74e-09	5.41e-08	pks7	polyketide synthase
Rv1665	102.751	106.493	37.6769	43.9337	0.389906	-1.3588	6.155	4.21e-23	1.24e-21	pks11	polyketide synthase (chalcone synthase-like)
Rv1701	129.596	111.968	62.5667	59.8307	0.506499	-0.98137	6.49147	3.02e-14	4.51e-13	Rv1701	integrase/recombinase
Rv1869c	684.73	737.399	344.352	337.595	0.47958	-1.06016	9.03544	6.64e-27	2.47e-25	Rv1869c	probable reductase (like rhodocoxin reductase)
Rv2156c	828.952	877.279	466.791	470.601	0.549426	-0.864002	9.36602	5.27e-20	1.34e-18	murX	phospho-N-acetylmuramoyl-pentapeptide transferase
Rv2157c	717.407	577.552	294.23	317.218	0.472069	-1.08293	8.89296	3.99e-20	1.02e-18	murF	D-alanine:D-alanine-adding enzyme
Rv2159c	1744.46	866.007	507.376	606.304	0.426586	-1.22909	9.86079	1.3e-07	8.46e-07	Rv2159c	hypothetical protein
Rv2162c	674.548	379.918	274.601	320.157	0.563906	-0.826473	8.6848	3.61e-05	0.000149131	PE_PGRS	PE_PGRS-family protein
Rv2189c	255.952	216.099	89.21	100.055	0.400718	-1.31934	7.35652	6.07e-27	2.28e-25	Rv2189c	hypothetical protein
Rv2243	2353.28	2157.34	584.398	585.156	0.259283	-1.9474	10.4695	1.65e-88	2.21e-86	FabD
Rv2244	2006.43	2344.45	637.214	581.687	0.280177	-1.83559	10.4411	3.58e-63	3.43e-61	acpM	acyl carrier protein (meromycolate extension)
Rv2245	5288.54	5330.77	1401.61	1407.9	0.264568	-1.91829	11.7121	1.11e-98	1.86e-96	kasA	[beta]-ketoacyl-ACP synthase (meromycolate
Rv2246	3564.45	3656.29	856.903	854.972	0.237081	-2.07655	11.1233	1.03e-114	1.92e-112
Rv2247	2713.84	2579.13	802.761	835.896	0.309583	-1.6916	10.7573	4.38e-71	5.05e-69	accD6	acetyl/propionyl CoA carboxylase [beta] subunit
Rv2248	560.781	639.172	158.919	152.178	0.259325	-1.94717	8.55277	1.98e-72	2.37e-70	Rv2248	conserved hypothetical protein
Rv2430c	476.266	475.354	286.917	261.531	0.576391	-0.79488	8.54727	3.18e-15	5.34e-14	PPE	PPE-family protein
Rv2499c	113.211	126.246	47.8552	46.3423	0.393623	-1.34511	6.35639	3.94e-24	1.23e-22	Rv2499c	putative aldehyde dehydrogenase
Rv2502c	210.409	190.227	106.445	111.328	0.543361	-0.880018	7.26341	2.29e-15	3.92e-14	accD1	acetyl/propionyl-CoA carboxylase, [beta] subunit
Rv2523c	199.208	180.458	90.1508	91.3358	0.477869	-1.06531	7.12017	2.64e-21	7.02e-20	acpS	CoA:apo-[ACP] pantethienephosphotransferase
Rv2524c	26423.3	23810.4	7918.47	8356.6	0.323986	-1.626	14.0211	2.81e-65	2.85e-63	fas	fatty acid synthase
Rv2592c	394.25	320.552	187.828	206.854	0.551943	-0.857409	8.11082	1.15e-12	1.48e-11	ruvB	Holliday junction binding protein
Rv2593c	217.444	155.982	83.5648	95.5268	0.479237	-1.06119	7.09839	2.99e-12	3.63e-11	ruvA	Holliday junction binding protein, DNA helicase
Rv2681	251.509	251.203	146.773	154.057	0.59837	-0.740891	7.64419	2.04e-13	2.86e-12	Rv2681	conserved hypothetical protein
Rv2845c	364.998	378.737	197.365	200.688	0.535246	-0.901725	8.1517	3.1e-19	7.35e-18	proS	prolyl-tRNA synthase
Rv2902c	377.68	321.089	194.928	195.823	0.55904	-0.838975	8.08461	3.28e-14	4.88e-13	rnhB	ribonuclease HII
Rv2987c	237.068	238.75	153.06	138.112	0.612073	-0.708225	7.57712	2.42e-11	2.63e-10	leuD	3-isopropylmalate dehydratase small subunit
Rv2988c	1190.9	1211.68	746.011	742.488	0.619555	-0.690695	9.92475	7.59e-14	1.1e-12	leuC	3-isopropylmalate dehydratase large subunit
Rv2989	689.636	499.078	309.669	348.145	0.553242	-0.854017	8.84777	1.18e-09	1.03e-08	Rv2989	transcriptional regulator (IclR family)
Rv2990c	729.904	766.814	287.345	294.336	0.388656	-1.36343	9.01672	5.15e-44	3.31e-42	Rv2990c	hypothetical protein
Rv3152	296.312	315.399	196.253	192.836	0.636189	-0.652473	7.9626	1.17e-10	1.16e-09	nuoH	NADH dehydrogenase chain H
Rv3220c	456.363	452.917	287.986	278.921	0.623487	-0.681568	8.52462	3.11e-12	3.77e-11	Rv3220c	sensor histidine kinase
Rv3285	1285.41	1041.42	686.78	731.746	0.609562	-0.714154	9.86969	2.18e-10	2.08e-09	accA3	acetyl/propionyl CoA carboxylase [alpha] subunit
Rv3332	108.861	63.7669	46.7433	55.0134	0.588744	-0.764289	6.08635	0.000269014	0.000911054	nagA	N-acetylglucosamine-6-P-deacetylase
Rv3433c	89.5139	46.2686	34.4694	43.4038	0.572712	-0.804119	5.72171	0.0010849	0.00313749	Rv3433c	conserved hypothetical protein
Rv3507	224.016	95.1137	72.4029	90.4205	0.509925	-0.971644	6.90267	0.000523074	0.00164493	PE_PGRS	PE_PGRS-family protein
Rv3551	111.36	108.211	39.6441	43.3074	0.377664	-1.40482	6.21232	1.55e-25	5.25e-24	Rv3551	possible glutaconate CoA-transferase
Rv3552	92.3835	109.391	41.4831	37.7675	0.393194	-1.34669	6.10412	6.57e-21	1.72e-19	Rv3552	hypothetical protein
Rv3553	76.4617	65.4846	32.0318	35.6479	0.476316	-1.07001	5.68282	1.65e-12	2.11e-11
Rv3693	166.994	134.619	85.2327	91.0467	0.584038	-0.775865	6.89101	4.3e-09	3.54e-08	Rv3693	conserved hypothetical protein
Rv3799c	2184.9	2203.5	1104.13	1091.16	0.500255	-0.999263	10.6836	6.47e-28	2.61e-26	accD4	acetyl/propionyl CoA carboxylase [beta] subunit
Rv3800c	15342.1	13108.8	5619.07	5910.38	0.405235	-1.30317	13.2868	2.84e-38	1.56e-36	pks13	polyketide synthase
Rv3801c	3840.67	3763.75	2017.15	2063.73	0.53664	-0.897973	11.5119	6.17e-24	1.9e-22	fadD32	acyl-CoA synthase
Rv3920c	150.609	123.991	95.5393	86.7593	0.663587	-0.591642	6.82868	6.07e-06	2.98e-05	Rv3920c	conserved hypothetical protein
